# Supplementary material for: Reply to the ‘Comment on “Strong Be–Be bonds in double-aromatic bridged Be2(μ-SO) molecules”’ by A. Guha, Dalton Transactions, 2023, 52, D3DT00774J
Source: Royal Society of Chemistry journal article supplement (doi:10.1039/d3dt01716h), 2023-01-01
Supplement: d3dt01716h1.pdf [file d3dt01716h1.pdf]

# Supporting Information

**Reply to the ‘Comment on  
“Strong Be–Be bonds in  
double-aromatic bridged  
Be<sub>2</sub>(μ-SO) molecules” by  
F. Rezaie and S.  
Noorizadeh, Dalton  
Trans., 2022, 51, 12596.**

F. Rezaie and S.  
Noorizadeh\*

## Output file of bridged Be<sub>2</sub>( $\mu$ -SO) molecule

Summary of Natural Population Analysis:

| Natural Population |    |                |         |         |         |          |
|--------------------|----|----------------|---------|---------|---------|----------|
| Atom               | No | Natural Charge | Core    | Valence | Rydberg | Total    |
| Be                 | 1  | 0.37729        | 1.99694 | 1.61287 | 0.01290 | 3.62271  |
| Be                 | 2  | 0.37695        | 1.99694 | 1.61319 | 0.01291 | 3.62305  |
| S                  | 3  | 0.24499        | 9.99819 | 5.60294 | 0.15388 | 15.75501 |
| O                  | 4  | -0.99923       | 1.99990 | 6.95852 | 0.04082 | 8.99923  |

---

---

\* Total \*    0.00000    15.99197    15.78752    0.22051    32.00000

| Natural Population    |                            |
|-----------------------|----------------------------|
| Core                  | 15.99197 ( 99.9498% of 16) |
| Valence               | 15.78752 ( 98.6720% of 16) |
| Natural Minimal Basis | 31.77949 ( 99.3109% of 32) |
| Natural Rydberg Basis | 0.22051 ( 0.6891% of 32)   |

| Atom No | Natural Electron Configuration                      |
|---------|-----------------------------------------------------|
| Be 1    | [core]2S( 0.86)2p( 0.76)3p( 0.01)                   |
| Be 2    | [core]2S( 0.86)2p( 0.76)3p( 0.01)                   |
| S 3     | [core]3S( 1.51)3p( 4.09)4S( 0.02)3d( 0.11)4p( 0.01) |
| O 4     | [core]2S( 1.82)2p( 5.14)3p( 0.01)3d( 0.03)          |

Wiberg bond index matrix in the NAO basis:

| Atom  | 1      | 2      | 3      | 4      |
|-------|--------|--------|--------|--------|
| 1. Be | 0.0000 | 0.9693 | 0.9370 | 0.1708 |
| 2. Be | 0.9693 | 0.0000 | 0.9381 | 0.1709 |
| 3. S  | 0.9370 | 0.9381 | 0.0000 | 1.1039 |
| 4. O  | 0.1708 | 0.1709 | 1.1039 | 0.0000 |

Wiberg bond index, Totals by atom:

Atom 1

```

---- -----
1. Be 2.0772
2. Be 2.0783
3. S 2.9791
4. O 1.4456

```

Atom-atom overlap-weighted NAO bond order:

```

Atom 1 2 3 4
---- -----
1. Be 0.0000 0.9687 0.9279 -0.0333
2. Be 0.9687 0.0000 0.9287 -0.0334
3. S 0.9279 0.9287 0.0000 0.9554
4. O -0.0333 -0.0334 0.9554 0.0000

```

Atom-atom overlap-weighted NAO bond order, Totals by atom:

```

Atom 1
---- -----
1. Be 1.8632
2. Be 1.8640
3. S 2.8121
4. O 0.8887

```

MO bond order:

```

Atom 1 2 3 4
---- -----
1. Be 0.0000 1.5658 0.4598 0.1595
2. Be 1.5658 0.0000 0.5079 -0.3309
3. S 0.4598 0.5079 0.0000 -0.7540
4. O 0.1595 -0.3309 -0.7540 0.0000

```

MO atomic valencies:

```

Atom 1
---- -----
1. Be 2.1851
2. Be 1.7428
3. S 0.2137
4. O -0.9253

```

NATURAL BOND ORBITAL ANALYSIS:

| Cycle | Thresh. | Occupancies |           | Lewis Structure |    |    |    | Low High |      | Dev  |
|-------|---------|-------------|-----------|-----------------|----|----|----|----------|------|------|
|       |         | Lewis       | Non-Lewis | CR              | BD | 3C | LP | (L)      | (NL) |      |
| 1(1)  | 1.90    | 30.43505    | 1.56495   | 8               | 7  | 0  | 1  | 4        | 4    | 0.17 |
| 2(2)  | 1.90    | 30.97164    | 1.02836   | 8               | 6  | 0  | 2  | 3        | 3    | 0.17 |
| 3(3)  | 1.90    | 30.97156    | 1.02844   | 8               | 6  | 0  | 2  | 3        | 3    | 0.17 |
| 4(1)  | 1.80    | 31.26818    | 0.73182   | 8               | 5  | 0  | 3  | 0        | 1    | 0.17 |
| 5(2)  | 1.80    | 31.26818    | 0.73182   | 8               | 5  | 0  | 3  | 0        | 1    | 0.17 |
| 6(1)  | 1.70    | 31.26818    | 0.73182   | 8               | 5  | 0  | 3  | 0        | 1    | 0.17 |
| 7(2)  | 1.70    | 31.26818    | 0.73182   | 8               | 5  | 0  | 3  | 0        | 1    | 0.17 |
| 8(1)  | 1.60    | 30.67506    | 1.32494   | 8               | 3  | 0  | 5  | 0        | 4    | 0.94 |
| 9(2)  | 1.60    | 30.67421    | 1.32579   | 8               | 3  | 0  | 5  | 0        | 4    | 0.94 |
| 10(3) | 1.60    | 30.67506    | 1.32494   | 8               | 3  | 0  | 5  | 0        | 4    | 0.94 |
| 11(1) | 1.50    | 30.50365    | 1.49635   | 8               | 2  | 0  | 6  | 0        | 4    | 0.94 |
| 12(2) | 1.50    | 30.50365    | 1.49635   | 8               | 2  | 0  | 6  | 0        | 4    | 0.94 |
| 13(1) | 1.80    | 31.26818    | 0.73182   | 8               | 5  | 0  | 3  | 0        | 1    | 0.17 |

Structure accepted: RESONANCE keyword permits strongly delocalized structure

```

1\1\GINC-PSM09\SP\RCCSD-FC\CC-pVTZ\Be2O1S1\REZAIE\06-Jul-2023\0\# ccs
d/cc-pvtz pop=nboread\Title Card Required\0,1\Be,0,1.652798,-0.98853
4,0.000164\Be,0,1.651609,0.989026,0.000164\S,0,-0.047372,-0.000067,-0.
000174\O,0,-1.557461,-0.000112,0.000184\Version=ES64L-G09RevD.01\Stat
e=1-A\HF=-501.570533\MP2=-502.0831334\MP3=-502.0853505\MP4D=-502.10219
38\MP4DQ=-502.0850024\MP4SDQ=-502.0973795\CCSD=-502.0931293\RMSD=5.430
e-09\PG=C01 [X(Be2O1S1)]\@

```

ADAM SMITH SAID, "THE REAL PRICE OF ANYTHING IS THE TOIL AND TROUBLE OF ACQUIRING IT." BUT IN ALL UNDERTAKINGS WITH NATURE WE SHOULD FIRST READ CAREFULLY THE SMALL PRINT IN THE CONTRACT. THIS MIGHT DISCLOSE THAT THE REAL PRICE IS TO BE PAID BY THOSE WHO INHERIT THE DEPLETION AND DESPOILATION THAT FOLLOWS.

-- E. R. HARRISON IN "COSMOLOGY" (1980)

Job cpu time: 0 days 0 hours 23 minutes 37.2 seconds.  
 File lengths (MBytes): RWF= 620 Int= 0 D2E= 0 Chk= 2 Scr= 1  
 Normal termination of Gaussian 09 at Thu Jul 6 17:39:26 2023.

## Output file of bridged Be2SO molecule

Summary of Natural Population Analysis:

| Natural Population                                   |    |          |         |         |         |          |
|------------------------------------------------------|----|----------|---------|---------|---------|----------|
| Atom                                                 | No | Charge   | Core    | Valence | Rydberg | Total    |
| Be                                                   | 1  | 0.42742  | 1.99785 | 1.56128 | 0.01344 | 3.57258  |
| Be                                                   | 2  | 0.74313  | 1.99773 | 1.23895 | 0.02018 | 3.25687  |
| S                                                    | 3  | -0.06827 | 9.99885 | 6.00241 | 0.06701 | 16.06827 |
| O                                                    | 4  | -1.10228 | 1.99979 | 7.09068 | 0.01181 | 9.10228  |
| =====                                                |    |          |         |         |         |          |
| * Total * 0.00000 15.99422 15.89333 0.11245 32.00000 |    |          |         |         |         |          |

| Natural Population    |                            |
|-----------------------|----------------------------|
| Core                  | 15.99422 ( 99.9639% of 16) |
| Valence               | 15.89333 ( 99.3333% of 16) |
| Natural Minimal Basis | 31.88755 ( 99.6486% of 32) |
| Natural Rydberg Basis | 0.11245 ( 0.3514% of 32)   |

| Atom | No | Natural Electron Configuration             |
|------|----|--------------------------------------------|
| Be   | 1  | [core]2S( 0.84)2p( 0.72)3p( 0.01)          |
| Be   | 2  | [core]2S( 0.76)2p( 0.48)4p( 0.01)4d( 0.01) |
| S    | 3  | [core]3S( 1.77)3p( 4.23)3d( 0.05)4p( 0.01) |
| O    | 4  | [core]2S( 1.82)2p( 5.27)3d( 0.01)          |

Wiberg bond index matrix in the NAO basis:

| Atom | 1     | 2     | 3     | 4     |
|------|-------|-------|-------|-------|
|      | ----- | ----- | ----- | ----- |

|       |        |        |        |        |
|-------|--------|--------|--------|--------|
| 1. Be | 0.0000 | 0.9826 | 0.8734 | 0.0545 |
| 2. Be | 0.9826 | 0.0000 | 0.0843 | 0.4744 |
| 3. S  | 0.8734 | 0.0843 | 0.0000 | 0.8402 |
| 4. O  | 0.0545 | 0.4744 | 0.8402 | 0.0000 |

Wiberg bond index, Totals by atom:

|       |        |
|-------|--------|
| Atom  | 1      |
| ----- |        |
| 1. Be | 1.9104 |
| 2. Be | 1.5413 |
| 3. S  | 1.7979 |
| 4. O  | 1.3690 |

Atom-atom overlap-weighted NAO bond order:

|       |        |        |        |        |
|-------|--------|--------|--------|--------|
| Atom  | 1      | 2      | 3      | 4      |
| ----- |        |        |        |        |
| 1. Be | 0.0000 | 0.8330 | 0.8039 | 0.0179 |
| 2. Be | 0.8330 | 0.0000 | 0.0869 | 0.5802 |
| 3. S  | 0.8039 | 0.0869 | 0.0000 | 0.5354 |
| 4. O  | 0.0179 | 0.5802 | 0.5354 | 0.0000 |

Atom-atom overlap-weighted NAO bond order, Totals by atom:

|       |        |
|-------|--------|
| Atom  | 1      |
| ----- |        |
| 1. Be | 1.6548 |
| 2. Be | 1.5002 |
| 3. S  | 1.4263 |
| 4. O  | 1.1335 |

MO bond order:

|       |         |         |         |         |
|-------|---------|---------|---------|---------|
| Atom  | 1       | 2       | 3       | 4       |
| ----- |         |         |         |         |
| 1. Be | 0.0000  | 1.9426  | -0.2178 | -0.1960 |
| 2. Be | 1.9426  | 0.0000  | -0.3653 | -0.3193 |
| 3. S  | -0.2178 | -0.3653 | 0.0000  | -0.2655 |
| 4. O  | -0.1960 | -0.3193 | -0.2655 | 0.0000  |

MO atomic valencies:

```
Atom 1
-----
1. Be 1.5288
2. Be 1.2579
3. S -0.8486
4. O -0.7809
```

NATURAL BOND ORBITAL ANALYSIS:

|       | Occupancies | Lewis Structure |           | Low | High |    |    |     |      |      |  |
|-------|-------------|-----------------|-----------|-----|------|----|----|-----|------|------|--|
| Occ.  | -----       | -----           |           | occ | occ  |    |    |     |      |      |  |
| Cycle | Thresh.     | Lewis           | Non-Lewis | CR  | BD   | 3C | LP | (L) | (NL) | Dev  |  |
| ===== |             |                 |           |     |      |    |    |     |      |      |  |
| ===== |             |                 |           |     |      |    |    |     |      |      |  |
| 1(1)  | 1.90        | 31.77182        | 0.22818   | 8   | 5    | 0  | 3  | 0   | 0    | 0.08 |  |
| ----- |             |                 |           |     |      |    |    |     |      |      |  |

Structure accepted: No low occupancy Lewis orbitals

.  
. .  
. .  
. .  
. .

```
1\1\GINC-PSM09\SP\RCCSD-FC\CC-pVTZ\Be2O1S1\REZAIE\06-Jul-2023\0\#\# ccs
d/cc-pvtz pop=nboread\Title Card Required\0,1\Be,0,-0.09722,1.623937
,0.001164\Be,0,1.584229,0.542975,-0.001571\S,0,-0.80748,-0.176607,-0.0
00335\O,0,0.871455,-0.730241,0.000872\Version=ES64L-G09RevD.01\State=
1-A\HF=-501.6776024\MP2=-502.1664312\MP3=-502.1795291\MP4D=-502.194551
8\MP4DQ=-502.1805161\MP4SDQ=-502.1875057\CCSD=-502.1855755\RMSD=6.761e
-09\PG=C01 [X(Be2O1S1)]\@
```

You don't have to suffer to be a poet.  
Adolescence is enough suffering for anyone.

-- John Ciardi

```
Job cpu time: 0 days 0 hours 17 minutes 30.4 seconds.
File lengths (MBytes): RWF= 620 Int= 0 D2E= 0 Chk= 2 Scr= 1
Normal termination of Gaussian 09 at Thu Jul 6 17:43:24 2023.
```

**Output file of bridged SBe2O molecule**

.

Summary of Natural Population Analysis:

| Natural Population |          |         |         |         |          |  |
|--------------------|----------|---------|---------|---------|----------|--|
| Atom No            | Charge   | Core    | Valence | Rydberg | Total    |  |
| Be 1               | 1.12881  | 1.99665 | 0.85172 | 0.02282 | 2.87119  |  |
| Be 2               | 1.12878  | 1.99665 | 0.85175 | 0.02282 | 2.87122  |  |
| O 3                | -1.34715 | 1.99987 | 7.30939 | 0.03789 | 9.34715  |  |
| S 4                | -0.91044 | 9.99916 | 6.85461 | 0.05667 | 16.91044 |  |

---

|           |         |          |          |         |          |  |
|-----------|---------|----------|----------|---------|----------|--|
| * Total * | 0.00000 | 15.99234 | 15.86747 | 0.14019 | 32.00000 |  |
|-----------|---------|----------|----------|---------|----------|--|

| Natural Population    |                            |
|-----------------------|----------------------------|
| Core                  | 15.99234 ( 99.9521% of 16) |
| Valence               | 15.86747 ( 99.1717% of 16) |
| Natural Minimal Basis | 31.85981 ( 99.5619% of 32) |
| Natural Rydberg Basis | 0.14019 ( 0.4381% of 32)   |

| Atom No | Natural Electron Configuration             |
|---------|--------------------------------------------|
| Be 1    | [core]2S( 0.28)2p( 0.58)3p( 0.01)4p( 0.01) |
| Be 2    | [core]2S( 0.28)2p( 0.58)3p( 0.01)4p( 0.01) |
| O 3     | [core]2S( 1.78)2p( 5.52)3d( 0.03)          |
| S 4     | [core]3S( 1.80)3p( 5.05)3d( 0.05)          |

Wiberg bond index matrix in the NAO basis:

| Atom  | 1      | 2      | 3      | 4      |
|-------|--------|--------|--------|--------|
| 1. Be | 0.0000 | 0.1061 | 0.5668 | 0.8459 |
| 2. Be | 0.1061 | 0.0000 | 0.5667 | 0.8461 |
| 3. O  | 0.5668 | 0.5667 | 0.0000 | 0.0441 |
| 4. S  | 0.8459 | 0.8461 | 0.0441 | 0.0000 |

Wiberg bond index, Totals by atom:



Atom 1

-----

- 1. Be 1.5188
- 2. Be 1.5189
- 3. O 1.1777
- 4. S 1.7361

Atom-atom overlap-weighted NAO bond order:

Atom 1 2 3 4

-----

- 1. Be 0.0000 0.3123 0.6228 0.8248
- 2. Be 0.3123 0.0000 0.6227 0.8249
- 3. O 0.6228 0.6227 0.0000 -0.0381
- 4. S 0.8248 0.8249 -0.0381 0.0000

Atom-atom overlap-weighted NAO bond order, Totals by atom:

Atom 1

-----

- 1. Be 1.7599
- 2. Be 1.7599
- 3. O 1.2074
- 4. S 1.6116

MO bond order:

Atom 1 2 3 4

-----

- 1. Be 0.0000 0.1579 0.0446 0.7720
- 2. Be 0.1579 0.0000 1.4396 0.2835
- 3. O 0.0446 1.4396 0.0000 -0.0505
- 4. S 0.7720 0.2835 -0.0505 0.0000

MO atomic valencies:

Atom 1

-----

- 1. Be 0.9745
- 2. Be 1.8810
- 3. O 1.4337

4. S 1.0049

NATURAL BOND ORBITAL ANALYSIS:

|       | Occupancies | Lewis Structure |           | Low | High |    |    |     |      |     |
|-------|-------------|-----------------|-----------|-----|------|----|----|-----|------|-----|
| Occ.  | -----       | -----           |           | occ | occ  |    |    |     |      |     |
| Cycle | Thresh.     | Lewis           | Non-Lewis | CR  | BD   | 3C | LP | (L) | (NL) | Dev |

---

---

|       |      |          |         |   |   |   |   |   |   |      |
|-------|------|----------|---------|---|---|---|---|---|---|------|
| 1(1)  | 1.90 | 31.51355 | 0.48645 | 8 | 6 | 0 | 2 | 0 | 2 | 0.11 |
| 2(2)  | 1.90 | 31.51348 | 0.48652 | 8 | 6 | 0 | 2 | 0 | 2 | 0.11 |
| 3(1)  | 1.80 | 31.16775 | 0.83225 | 8 | 3 | 0 | 5 | 0 | 5 | 0.57 |
| 4(2)  | 1.80 | 31.16773 | 0.83227 | 8 | 3 | 0 | 5 | 0 | 5 | 0.57 |
| 5(3)  | 1.80 | 31.16775 | 0.83225 | 8 | 3 | 0 | 5 | 0 | 5 | 0.57 |
| 6(4)  | 1.80 | 31.16773 | 0.83227 | 8 | 3 | 0 | 5 | 0 | 5 | 0.57 |
| 7(1)  | 1.70 | 31.02813 | 0.97187 | 8 | 2 | 0 | 6 | 0 | 6 | 0.57 |
| 8(2)  | 1.70 | 31.02813 | 0.97187 | 8 | 2 | 0 | 6 | 0 | 6 | 0.57 |
| 9(1)  | 1.60 | 30.69183 | 1.30817 | 8 | 2 | 0 | 6 | 0 | 6 | 0.85 |
| 10(2) | 1.60 | 30.69178 | 1.30822 | 8 | 2 | 0 | 6 | 0 | 6 | 0.85 |
| 11(3) | 1.60 | 30.69183 | 1.30817 | 8 | 2 | 0 | 6 | 0 | 6 | 0.85 |
| 12(1) | 1.50 | 30.53603 | 1.46397 | 8 | 1 | 0 | 7 | 0 | 8 | 0.85 |
| 13(2) | 1.50 | 30.53607 | 1.46393 | 8 | 1 | 0 | 7 | 0 | 8 | 0.85 |
| 14(3) | 1.50 | 30.53603 | 1.46397 | 8 | 1 | 0 | 7 | 0 | 8 | 0.85 |
| 15(1) | 1.90 | 31.51355 | 0.48645 | 8 | 6 | 0 | 2 | 0 | 2 | 0.11 |

---

Structure accepted: RESONANCE keyword permits strongly delocalized structure

.  
. .  
. .  
. .  
. .

1\1\GINC-PSM11\SP\RCCSD-FC\CC-pVTZ\Be2O1S1\REZAIE\06-Jul-2023\0\# ccs  
d/cc-pvtz pop=nboread\Title Card Required\0,1\Be,0,-0.579972,0.92645  
5,0.00002\Be,0,-0.579794,-0.926485,0.00002\O,0,-1.711245,-0.00002,-0.0  
00012\S,0,1.145564,0.000017,-0.000004\Version=ES64L-G09RevD.01\State=  
1-A\HF=-501.8500419\MP2=-502.3408955\MP3=-502.3501845\MP4D=-502.361365  
3\MP4DQ=-502.348823\MP4SDQ=-502.3539202\CCSD=-502.3520058\RMSD=5.064e-  
09\PG=C01 [X(Be2O1S1)]\@

TELEVISION IS CALLED A MEDIUM BECAUSE IT ISN'T  
RARE, AND IT ISN'T WELL DONE.

Job cpu time: 0 days 0 hours 12 minutes 4.9 seconds.

File lengths (MBytes): RWF= 620 Int= 0 D2E= 0 Chk= 2 Scr= 1  
Normal termination of Gaussian 09 at Thu Jul 6 17:43:45 2023.
